# Supplementary material
Source: PubMed Central journal article supplement (PMC4286196)
Supplement: pr500936p_si_004.pdf [file pr500936p_si_004.pdf]

Table S1. 21 microbial isolate reference genome database

| Genome                                            |                                                      |
|---------------------------------------------------|------------------------------------------------------|
| <i>Acinetobacter junii</i> SH205                  | <i>Eubacterium rectale</i> ATCC 33656                |
| <i>Bifidobacterium adolescentis</i> ATCC 15703    | <i>Fusobacterium</i> sp. 1_1_41FAA                   |
| <i>Bacteroides fragilis</i> NCTC 9343             | <i>Klebsiella</i> sp. 1_1_55                         |
| <i>Bifidobacterium longum infantis</i> ATCC 15697 | <i>Leuconostoc mesenteroides cremoris</i> ATCC 19254 |
| <i>Campylobacter concisus</i> 13826               | <i>Lactobacillus reuteri</i> 100-23                  |
| <i>Citrobacter koseri</i> ATCC BAA-895            | <i>Pseudomonas aeruginosa</i> PAO1                   |
| <i>Citrobacter</i> sp. 30_2                       | <i>Staphylococcus aureus</i> 04-02981                |
| <i>Clostridium sporogenes</i> ATCC 15579          | <i>Serratia odorifera</i> 4Rx13                      |
| <i>Enterobacter cancerogenus</i> ATCC 35316       | <i>Streptococcus</i> sp. 2_1_36FAA                   |
| <i>Escherichia coli</i> K12 DH10B                 | <i>Weissella paramesenteroides</i> ATCC 33313.       |
| <i>Enterococcus faecalis</i> TX0104               |                                                      |
