# Supplementary material
Source: PubMed Central journal article supplement (PMC4286196)
Supplement: pr500936p_si_005.pdf [file pr500936p_si_005.pdf]

Table S2. Collected and assigned mass spectra results

| Run       | Infant #UN1 |                | Infant #CA1 |                |
|-----------|-------------|----------------|-------------|----------------|
|           | Direct      | Indirect<br>DF | Direct      | Indirect<br>DF |
| Collected | 286530      | 286671         | 279174      | 278277         |
| Assigned  | 80322       | 86001          | 81937       | 93728          |
| Human     | 47165       | 6221           | 78260       | 48550          |
| Microbial | 32730       | 78675          | 3277        | 44021          |
