# Supplementary material
Source: PubMed Central journal article supplement (PMC4286196)

Figure S1.

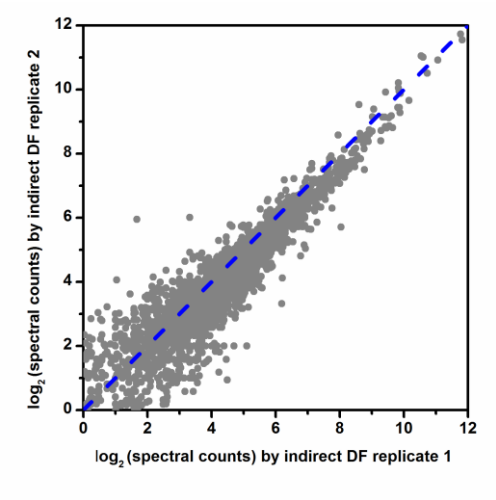

Supplement: pr500936p_si_001.pdf [file pr500936p_si_001.pdf]

Figure S2.

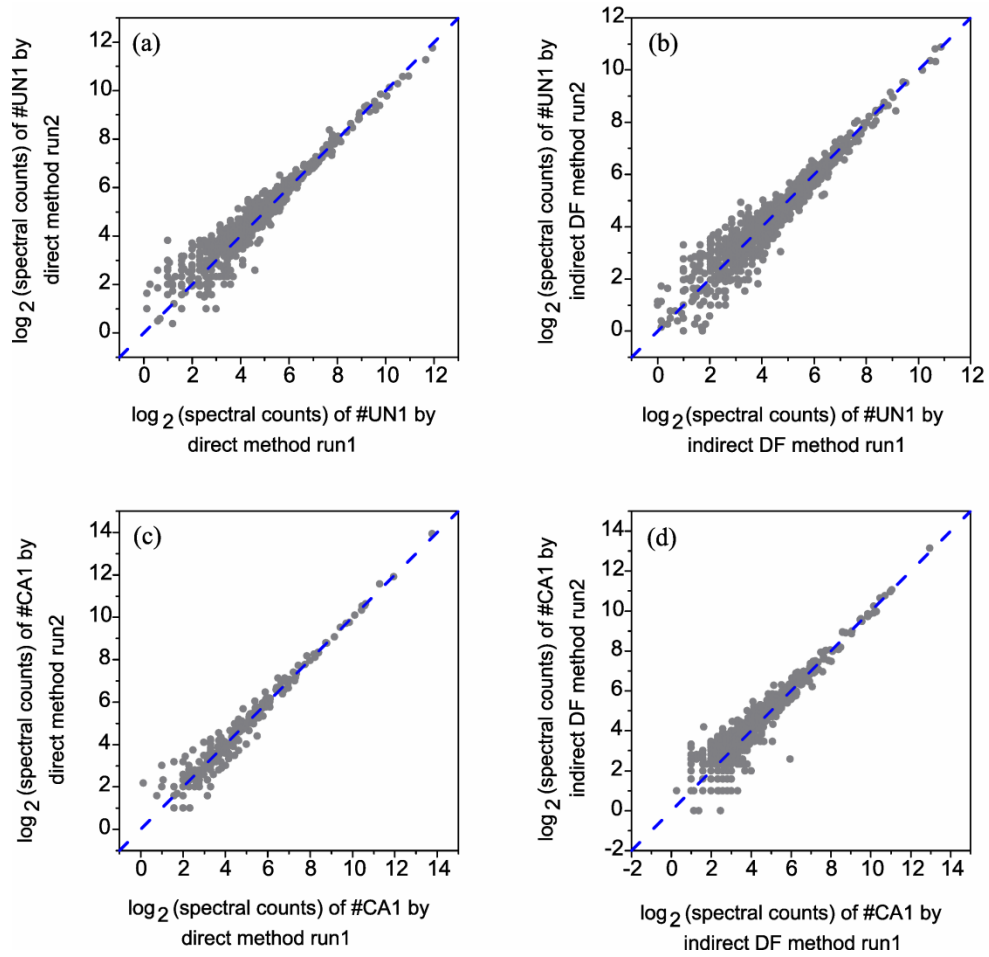

Supplement: pr500936p_si_002.pdf [file pr500936p_si_002.pdf]

Figure S3.

(a)

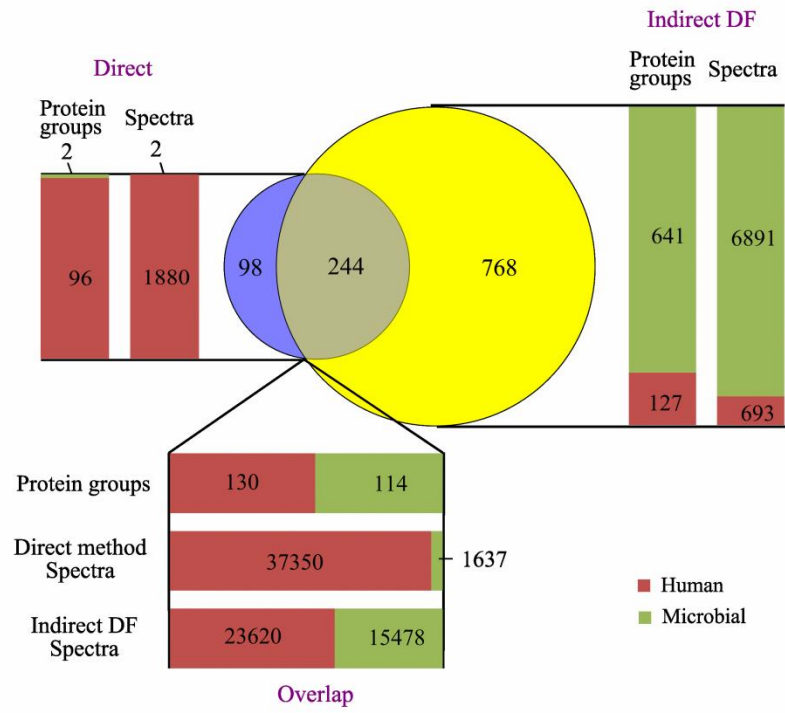

(b)

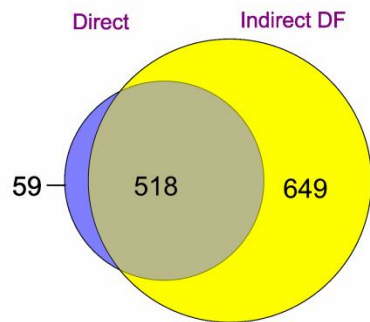

(c)

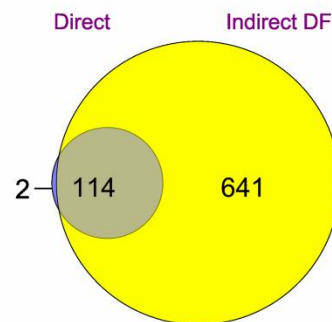

Supplement: pr500936p_si_003.pdf [file pr500936p_si_003.pdf]
